# Supplementary material for: Synthesis and characterization of silicone polymer/functionalized mesostructured silica composites
Source: Royal Society of Chemistry journal article supplement (doi:10.1039/c1py00316j), 2011-01-01
Supplement: c1py00316j.pdf [file c1py00316j.pdf]

# SUPPORTING INFORMATION

## Synthesis and Characterization of Silicone Polymer/Functionalized Mesostructured Silica Composites

Satyajit Gupta,<sup>ab</sup> Praveen C Ramamurthy,<sup>\*ab</sup> Giridhar Madras<sup>b</sup>

<sup>a</sup> Department of Materials Engineering and <sup>b</sup> Institute Nanoscience Initiative, Indian Institute of Science, Bangalore 560012, India

---

\*E-Mail: [praveen@materials.iisc.ernet.in](mailto:praveen@materials.iisc.ernet.in). Fax:+91-80-2360-0472. Tel: +91-80-2293-2627.

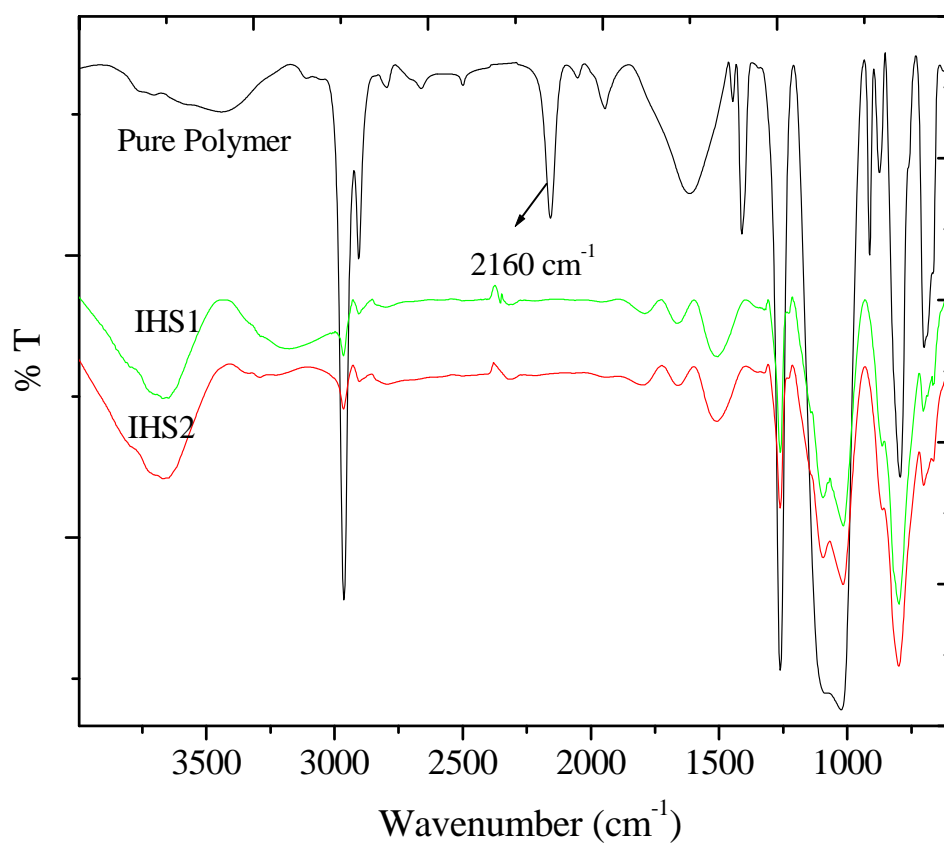

**Fig. S1.** FTIR spectra of pure polymer and composites.

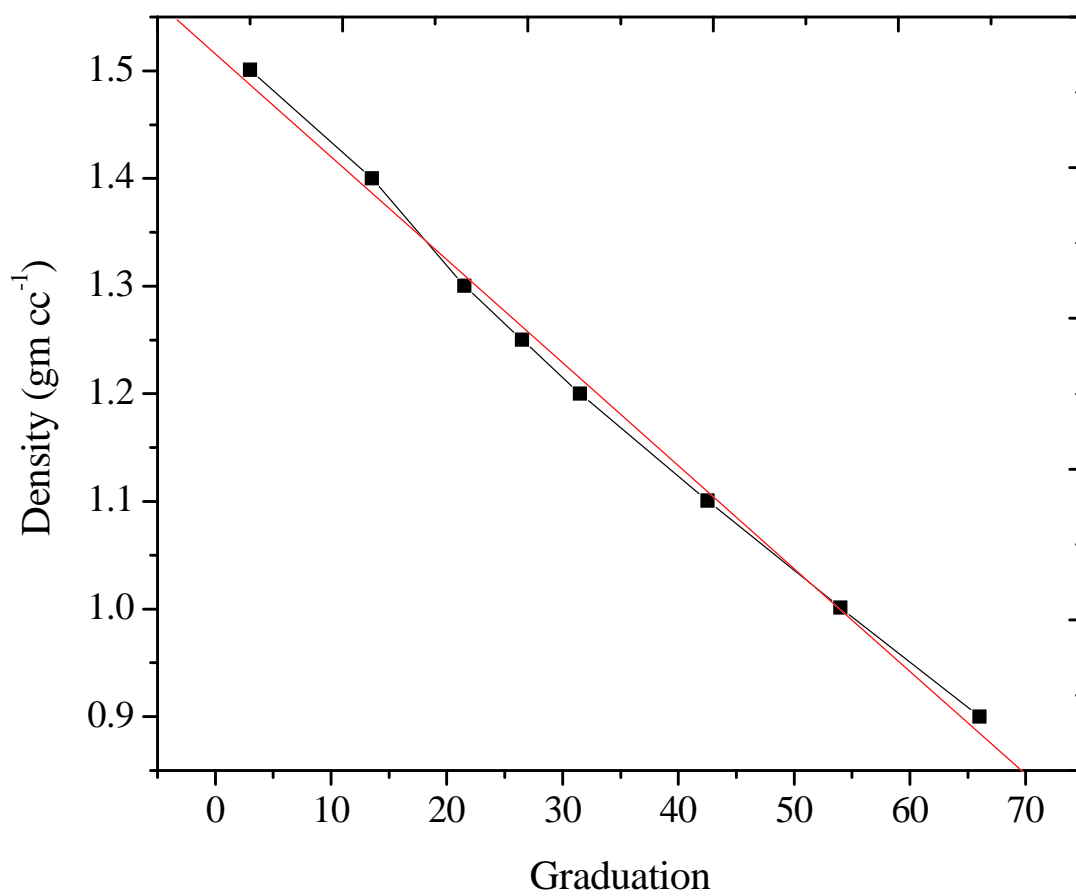

**Fig. S2.** Calibration curve for the density gradient column

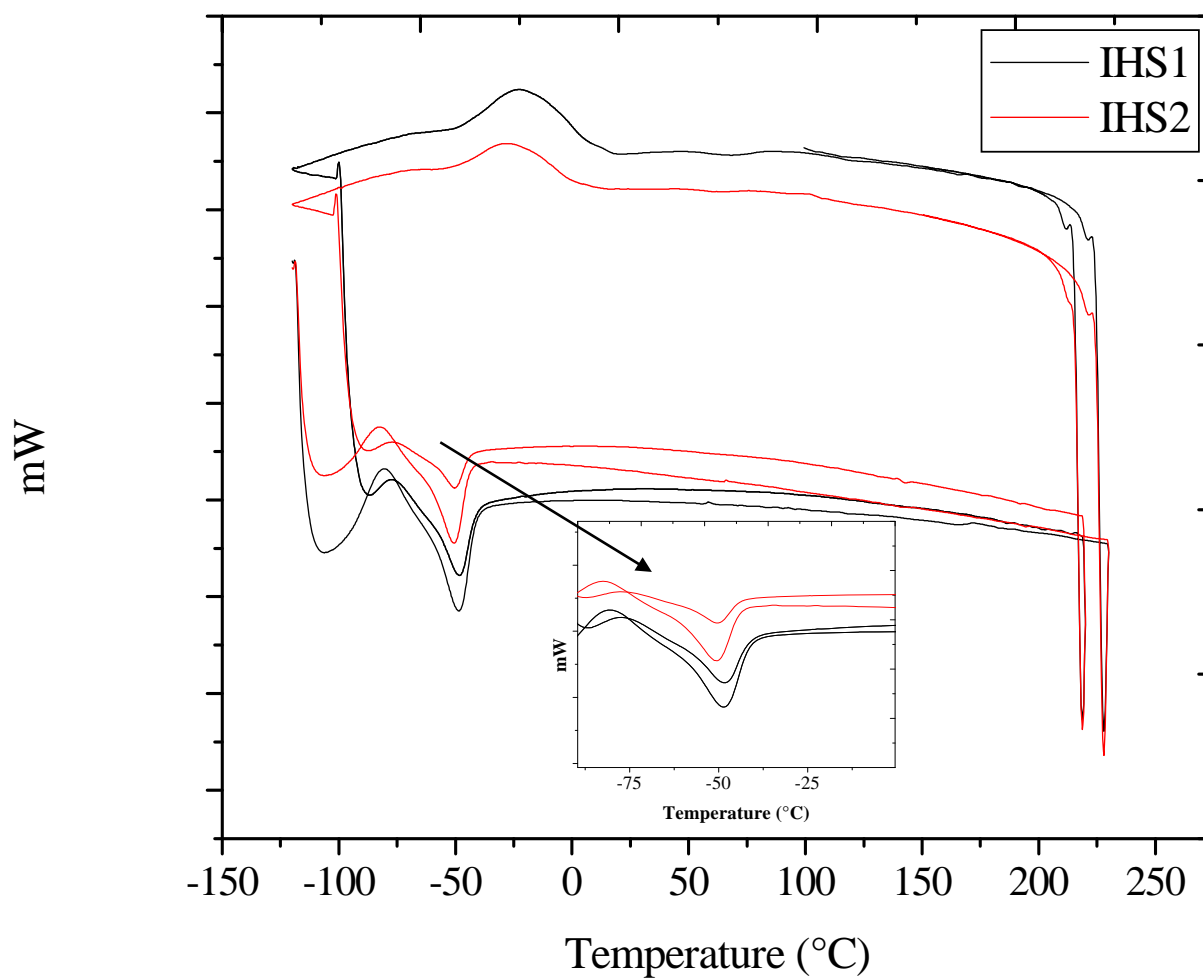

**Fig. S3.** DSC traces for the two composites
